# Supplementary material for: Offset nail fixation for intertrochanteric fractures improves reduction and lag screw position
Source: Research Square preprint supplement (doi:10.21203/rs.3.rs-1240018/v1), 2022-01-27
Supplement: Supplementary file 1 [file b626672cb5069793e83982a0.xlsx]

## Sheet: Sheet1
BFN group												Control group
Case #	Age (years)	Male: 0 Female: 1	Body height (cm)	Body weight (kg)	AO classification	Nail	Deviation angle	Displacement distance (mm)	Reduction status	Deviation		Case #	Age (years)	Male: 0 Female: 1	Body height (cm)	Body weight (kg)	AO classification	Nail	Deviation angle	Displacement distance (mm)	Reduction status	Deviation
BFN 1	84	0	148	38.5	A2	125	0	0	A	C		Cont 1	88	1	152.8	45	A2	125	3.76	6.15	I	P
BFN 2	89	1	145	42	A2	125	4.3	0	A	PA		Cont 2	100	1	141.5	42.8	A1	125	4.53	3.81	I	P
BFN 3	83	0	175	76.4	A2	125	-6.5	6.5	I	AP		Cont 3	89	1	149.4	49.9	A2	125	5.3	4.1	I	PA
BFN 4	94	1	150	62.1	A2	125	0	0	A	C		Cont 4	89	0	156	37.8	A2	125	12.93	6.86	I	PA
BFN 5	94	1	150	62.1	A2	130	-1.8	0	A	C		Cont 5	70	0	173	70	A2	130	-1.74	4.03	I	AP
BFN 6	85	1	148	44.3	A2	130	-7.8	12.1	I	PA		Cont 6	91	0	157	47.1	A1	130	3.63	4.08	I	P
BFN 7	82	0	165	50.9	A3	125	-1.56	0	A	C		Cont 7	87	1	146	45.6	A2	125	2.95	5.01	I	P
BFN 8	93	1	155	58	A1	130	0	0	A	PA		Cont 8	93	1	148	39.4	A2	130	7.34	0	A	PA
BFN 9	87	1	150	61.9	A2	125	0	0	A	C		Cont 9	93	1	148	45.5	A2	125	-3.69	0	A	P
BFN 10	81	1	143	45.5	A2	125	-2.55	0	A	AP		Cont 10	91	1	152.6	48.3	A2	125	5.38	6.48	I	PA
BFN 11	88	0	151	45.7	A1	130	-2.13	0	A	C		Cont 11	77	1	150	33	A2	130	12.72	5.25	I	PA
BFN 12	78	1	155	60	A2	125	0	0	A	C		Cont 12	92	1	142	51.6	A2	125	0	3.18	I	C
BFN 13	83	0	153	50	A2	130	0	0	A	AP		Cont 13	84	1	145.3	48.7	A2	130	0	7.95	I	C
BFN 14	80	1	148	47.9	A2	125	0	0	A	C		Cont 14	94	1	136.5	41.2	A2	125	4.43	7.26	I	PA
BFN 15	87	0	164	63.3	A1	130	0	0	A	C		Cont 15	97	1	145	38.3	A2	130	4.61	0	A	PA
BFN 16	70	0	164.5	53.9	A2	125	0	0	A	C		Cont 16	85	0	172	65	A1	125	6.03	3.51	I	PA
BFN 17	80	1	148.6	46	B2	125	0	3.8	I	C		Cont 17	85	0	172	65	A2	125	5.36	2.89	I	PA
BFN 18	97	1	135	32.5	A2	130	0	0	I	C		Cont 18	92	0	162.2	57	A2	130	4.41	6.01	I	C
BFN 19	103	1	148	31.5	A2	125	11.88	6.53	I	PA		Cont 19	89	1	145	52	A2	125	6.55	4.4	E	PA
BFN 20	90	1	148	51.3	A2	130	-3.19	0	A	C		Cont 20	88	1	150	49.1	A2	130	6.77	-4.51	E	PA
BFN 21	76	1	156	63.5	A2	125	0	0	A	AP		Cont 21	86	1	153	47.4	A2	125	9.3	-2.48	E	PA
BFN 22	79	0	160	53	A2	130	11.8	-9.6	E	C		Cont 22	89	0	159.1	39.2	A1	130	8.02	5	I	AP
BFN 23	99	1	143	41	B2	125	0	0	A	C		Cont 23	93	1	144.5	49	A3	125	3.79	0	A	PA
BFN 24	90	1	135	37.9	A2	125	0	0	A	C		Cont 24	99	1	149.2	46	A2	125	-3	8.34	I	P
BFN 25	90	1	156	43.5	A2	130	-1.92	0	A	C		Cont 25	88	1	142	40.2	A2	130	2.71	5.05	I	P
BFN 26	85	1	158	47.1	A2	130	2.3	0	A	PA		Cont 26	89	1	155	37.5	A2	130	7.19	-4.6	E	PA
BFN 27	86	1	156.5	35.4	A2	125	0	0	A	C		Cont 27	96	1	140.1	45.4	A2	125	4.41	4.23	I	C
BFN 28	94	1	145	43	A2	125	3	6.82	I	P		Cont 28	97	1	140.1	45.4	A2	125	3.42	4.08	I	P
BFN 29	95	1	155	36.2	A2	130	-1.9	0	A	AP		Cont 29	94	1	137	37	A2	130	0	6.24	I	PA
BFN 30	90	1	135	40.2	A2	125	0	0	A	C		Cont 30	72	1	145.3	38.1	A2	125	3.58	4.47	I	PA
BFN 31	87	0	162	45.6	A2	130	-0.4	0	A	C		Cont 31	87	1	157	31	A1	130	5.05	0	A	PA
BFN 32	98	1	134	29.7	A2	125	0	0	A	C		Cont 32	83	0	154	52.2	A2	125	3.18	5.28	I	PA
BFN 33	79	1	148	27.9	A1	125	0	0	A	C		Cont 33	84	0	165.9	51.8	A2	125	3.93	7.51	I	PA
BFN 34	105	1	147	57.2	A2	130	-4.9	13.3	I	C		Cont 34	70	0	162	55	A2	130	4.46	4.93	I	P
BFN 35	77	0	168	72	A2	125	-7	0	A	AP		Cont 35	90	1	140.5	43	A2	125	2.07	9.7	I	P
BFN 36	89	1	147	52.5	A2	125	-3.53	0	A	C		Cont 36	96	1	136.2	33	A2	125	3.93	4.2	I	PA
BFN 37	88	1	130	36	A2	125	-0.56	0	A	C		Cont 37	93	1	147.2	44.6	A2	125	3.98	11.1	I	PA
BFN 38	96	1	146	39	A1	125	-5.64	0	A	AP		Cont 38	71	1	135.2	68	A1	125	4.94	2.77	I	PA
BFN 39	84	1	150	43.9	A2	125	-2.5	0	A	P		Cont 39	88	0	148	46.7	A1	125	6.17	2.94	I	PA
BFN 40	92	1	150	33	A2	125	0	0	A	C		Cont 40	72	0	169	57	A2	125	8.39	4.68	I	PA
BFN 41	88	1	145	37.5	A1	125	-12.2	0	A	AP		Cont 41	70	0	169	57	A2	125	4.2	5.94	I	PA
BFN 42	86	1	152	51.3	A2	130	2.7	0	A	AP		Cont 42	95	1	142	39.8	A2	130	20.59	6.8	I	P
BFN 43	90	1	150	37.6	A2	125	-4.4	0	A	AP		Cont 43	92	1	150.8	46.6	A2	125	10.23	5.2	I	AP
BFN 44	81	1	148	32.7	A2	125	-0.65	0	A	AP		Cont 44	86	1	152	46.7	A2	125	21.54	8.5	I	PA
BFN 45	102	1	145	37.5	A2	125	0	0	A	C		Cont 45	90	0	157.8	49.6	A2	125	8.21	6.4	I	PA
BFN 46	52	0	170	60	A2	125	3.2	3.72	I	PA		Cont 46	88	1	137.3	37.6	A1	125	3.28	4.19	I	PA
BFN 47	79	1	156	61.2	A1	125	0	0	A	AP		Cont 47	80	0	160	58.1	A1	125	-3.76	3.76	I	AP
BFN 48	86	1	152	45.7	A2	125	-0.5	5.19	I	AP		Cont 48	88	1	160	59.9	A2	125	18.67	3.69	I	PA
BFN 49	88	1	147	40.4	A2	125	2.84	0	A	C		Cont 49	100	1	133	35.8	A1	125	14.18	7.01	I	PA
BFN 50	93	1	141.9	29.5	A2	130	-6.05	0	A	AP		Cont 50	83	0	161.4	49	A2	130	9.63	0	A	PA
Average	87.04		150.65	46.696			-0.7132	0.9672					87.66		150.958	47.198			5.6712	4.2278
Reduction status: I, intraarticular; A, anatomical; E, extraarticular
Deviation: P, posterior; A, anterior; C, central; PA, posterior to anterior; AP, anterior to posterior
